# Supplementary material for: Exposure of (001) planes and (011) planes in MFI zeolite
Source: Royal Society of Chemistry journal article supplement (doi:10.1039/c3ce40142a), 2013-01-01
Supplement: c3ce40142a.pdf [file c3ce40142a.pdf]

## Supporting Information

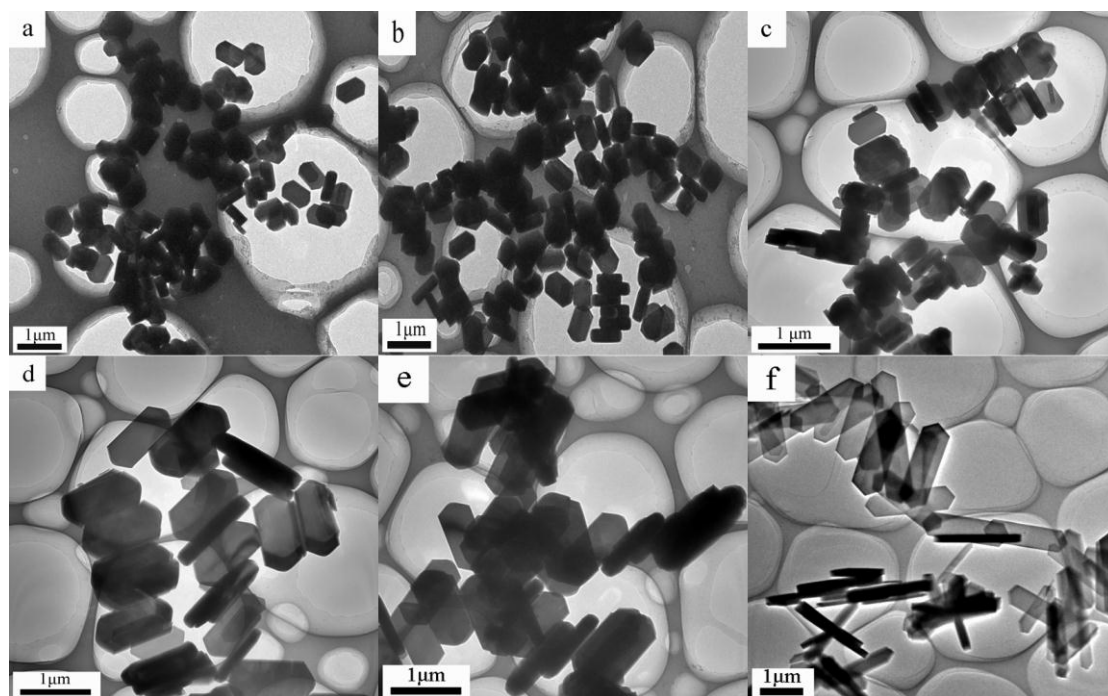

Fig. S1 Low magnification TEM images of crystals in sample (a) OC-1.5, (b) OC-1.2, (c) OC-1.0, (d), (e) OC-0.8 and (f) OC-0.5.
